# Supplementary material for: Water-Soluble Tomato Concentrate, a Potential Antioxidant Supplement, Can Attenuate Platelet Apoptosis and Oxidative Stress in Healthy Middle-Aged and Elderly Adults: A Randomized, Double-Blinded, Crossover Clinical Trial
Source: MDPI journal article supplement (doi:10.3390/nu14163374), 2022-08-17
Supplement: s1 [file s1]

**Supplemental Table S1 The composition of water-soluble tomato extract**

| <b>Components</b>                              | <b>Content</b> |
|------------------------------------------------|----------------|
| <b>Physicochemical parameters</b>              |                |
| Moisture content (%)                           | 3.3            |
| Ash content (%)                                | 1.9            |
| <b>Microbe Index</b>                           |                |
| Total number of colonies (CFU/g)               | ≤1000          |
| Mold and yeast (CFU/g)                         | ≤100           |
| Escherichia coli                               | -              |
| Salmonella                                     | -              |
| Staphylococcus aureus                          | -              |
| Pseudomonas aeruginosa                         | -              |
| <b>Active ingredient</b>                       |                |
| nucleosides, polyphenols and flavonoids (mg/g) | 23             |

**Supplemental Table S2 Anthropometric measurements, lipid profiles and glucose at baseline and 4 weeks after treatment <sup>b</sup>**

|                          | Placebo (n=52)          |            | 150mg WSTC(n=52) |            |
|--------------------------|-------------------------|------------|------------------|------------|
|                          | Baseline                | 4 weeks    | Baseline         | 4 weeks    |
| Weight (kg)              | 63.85±1.68 <sup>a</sup> | 63.40±1.66 | 64.21±1.70       | 63.61±1.71 |
| BMI (kg/m <sup>2</sup> ) | 24.45±0.45              | 24.29±0.45 | 24.59±0.46       | 24.33±0.46 |
| NC (cm)                  | 35.24±1.27              | 33.35±0.44 | 36.26±1.60       | 34.47±1.06 |
| WC (cm)                  | 83.31±1.88              | 84.92±1.13 | 82.81±1.78       | 84.09±1.61 |
| HC (cm)                  | 95.13±0.90              | 94.85±0.93 | 95.13±0.89       | 95.49±0.91 |
| WHR                      | 0.87±0.02               | 0.89±0.01  | 0.87±0.02        | 0.88±0.01  |
| TG (mmol/L)              | 1.53±0.09               | 1.56±0.15  | 1.47±0.09        | 1.48±0.09  |
| TC (mmol /L)             | 5.07±0.12               | 5.11±0.12  | 5.02±0.11        | 4.97±0.13  |
| HDL-c (mmol /L)          | 1.34±0.04               | 1.29±0.04  | 1.32±0.04        | 1.30±0.04  |
| LDL-c (mmol /L)          | 3.38±0.11               | 3.43±0.11  | 3.35±0.10        | 3.32±0.12  |
| FBG (mmol/L)             | 5.15±0.07               | 5.23±0.09  | 5.16±0.08        | 5.19±0.08  |

<sup>a</sup> Mean ± SEM (all such values).

<sup>b</sup> A one-way analysis of variance for independent data are used for comparison between the two groups at baseline and after 4 weeks of intervention. There are no significant differences for anthropometric measurements, lipid profiles and glucose between the two groups at baseline and after 4 weeks of intervention.

Abbreviation: BMI body mass index, NC neck circumference, WC waist circumference, HC hip circumference, WHR waist-to-hip ratio, TC total cholesterol, HDL-c high density lipoprotein cholesterol, LDL-c low density lipoprotein cholesterol, TG total triglyceride, FBG fasting blood glucose.

**Supplemental Table S3 Daily dietary intakes and physical activity at baseline and 4 weeks after treatment <sup>b</sup>**

|                                     | Placebo (n=52)              |                | 150mg WSTC(n=52) |                |
|-------------------------------------|-----------------------------|----------------|------------------|----------------|
|                                     | Baseline                    | 4 weeks        | Baseline         | 4 weeks        |
| Total energy(kcal/d)                | 1620.96±104.48 <sup>a</sup> | 1533.05±70.59  | 1590.57±86.16    | 1486.48±70.59  |
| Total protein(g/d)                  | 72.80±4.19                  | 68.98±3.08     | 73.02±4.32       | 67.13±3.34     |
| Carbohydrates (g/d)                 | 207.90±13.31                | 210.47±13.59   | 214.81±13.08     | 200.22±12.21   |
| Total lipids (g/d)                  | 54.84±5.50                  | 45.89±2.84     | 49.25±3.86       | 46.39±2.81     |
| Cholesterol (mg/d)                  | 424.68±36.07                | 398.15±22.47   | 457.68±36.07     | 385.63±30.54   |
| Dietary fiber (g/d)                 | 12.45±1.11                  | 11.70±0.84     | 11.29±0.91       | 10.99±0.86     |
| Vitamin C (mg/d)                    | 113.10±9.87                 | 128.69±11.10   | 123.35±12.82     | 121.67±10.63   |
| Vitamin A (ug retinol equivalent/d) | 661.38±59.34                | 625.63±63.90   | 869.99±161.48    | 663.30±57.02   |
| Vitamin E (mg/d)                    | 14.56±1.41                  | 13.72±1.02     | 14.21±1.42       | 12.71±1.13     |
| Physical activities (MET-min/week)  | 6883.57±561.48              | 7086.64±624.20 | 7101.01±544.80   | 7216.35±719.31 |

<sup>a</sup> Mean ± SEM (all such values).

<sup>b</sup> A one-way analysis of variance for independent data are used for comparison between the two groups at baseline and after 4 weeks of intervention. There are no significant differences for daily dietary intakes and physical activity between the two groups at baseline and after 4 weeks of intervention.

Abbreviation: SEM, standard error of mean, MET metabolic equivalent.
